# Supplementary material
Source: PubMed Central journal article supplement (PMC6446422)
Supplement: Supplemental_material.pdf [file Supplemental_material.pdf]

### Supplemental Figure 1.

This graph shows plasma concentration of caffeine as a function of injected caffeine dose. Whisker box plots show a dose-response relationship between plasma concentration and injected dose, as expected (n = 4 mice per tested dose). Acute treatment with caffeine produced plasma levels in mice similar to those reported previously.<sup>1,2</sup>

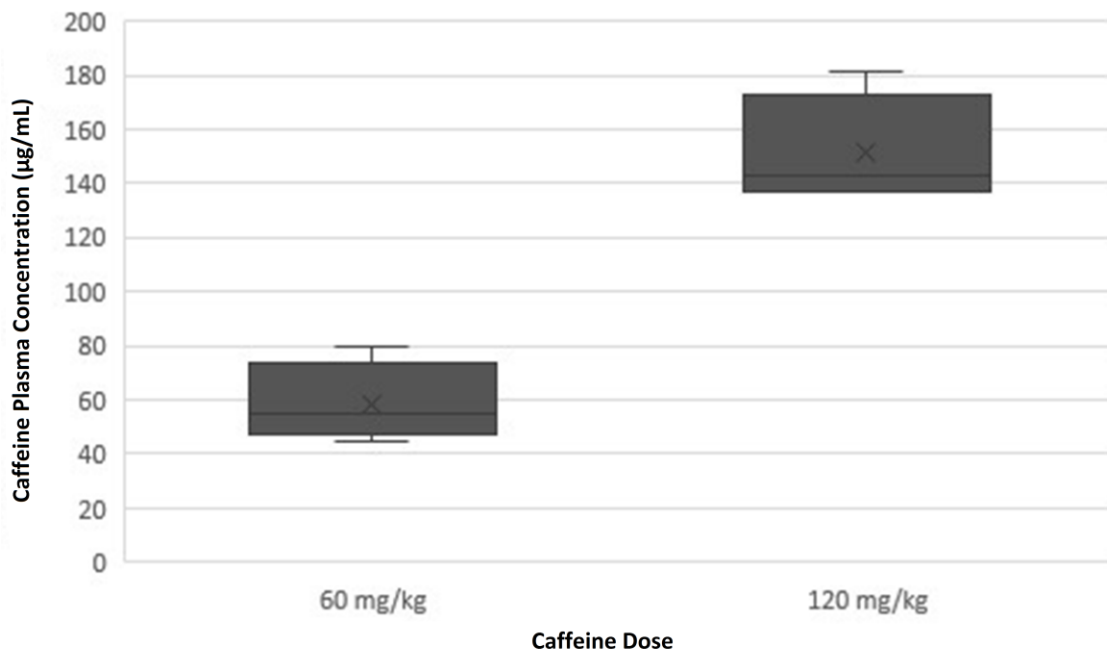

1. Kaplan, G.B., Tai, N.T., Greenblatt, D.J. & Shader, R.I. Caffeine-induced behavioural stimulation is dose- and concentration-dependent. *British journal of pharmacology* **100**, 435-440 (1990).
2. Kaplan, G.B., Greenblatt, D.J., Leduc, B.W., Thompson, M.L. & Shader, R.I. Relationship of plasma and brain concentrations of caffeine and metabolites to benzodiazepine receptor binding and locomotor activity. *The Journal of pharmacology and experimental therapeutics* **248**, 1078-1083 (1989).
